# Supplementary material for: Pioglitazone Hydrochloride Extends the Lifespan of Caenorhabditis elegans by Activating DAF-16/FOXO- and SKN-1/NRF2-Related Signaling Pathways
Source: Oxid Med Cell Longev. 2022 May 29;2022:8496063. doi: 10.1155/2022/8496063 (PMC9168093; doi:10.1155/2022/8496063)
Supplement: Supplementary Materials — Table S1: effect of PGZ on the lifespan of C. elegans. Table S2: the gene-specific primer sequences (qPCR). [file 8496063.f1.docx]

**Pioglitazone Hydrochloride Extends the Lifespan of *Caenorhabditis elegans* by Activating DAF-16/FOXO- and SKN-1/NRF2-related Signaling Pathways**

Wenjuan Jia 1, 2, #,Chongyang Wang 3, #,Jingming Zheng 4,Yimin Li 4, Caixian Yang 2, Qin-Li Wan 4, *,Jie Shen 1, 5, *

1Department of Endocrinology and Metabolism, The Third Affiliated Hospital, Southern Medical University, Guangzhou 510630, China

2Department of Endocrinology, Sixth Affiliated Hospital of Guangzhou Medical University, Qingyuan People’s Hospital, Qingyuan 511518, China

3Zhuhai Precision Medical Center, Zhuhai People’s Hospital (Zhuhai Hospital Affiliated with Jinan University), Jinan University, Guangzhou 510632, China

4Department of pathogen biology, school of medicine, Jinan University, Guangzhou 510632, China

5Institute and Department of Endocrinology and Metabolism, Shunde Hospital，Southern Medical University (The First People's Hospital of Shunde), Foshan 528399, China

# Wenjuan Jia and Chongyang Wang contributed equally to this work.

* Correspondence should be addressed to Jie Shen; [sjiesy@smu.edu.cn](mailto:sjiesy@smu.edu.cn) and Qin-Li Wan; wanqinli@hotmail.com

**Table S1** Effect of PGZ on the lifespan of C. elegans

| **Figure** | **Strains** | **Treatments** | **Mean**  **Lifespan ± SEM**  **(days)** | ***P* value**  **VS**  **Control** | **%**  **Change in mean lifespan** | **N** |
| --- | --- | --- | --- | --- | --- | --- |
| **N2(WT)** | |  |  |  |  |  |
| **Figure 1** | EXP. 1 | 20 ℃ / Control | 20.766±0.327 |  |  | 94 |
| EXP. 1 | 20 ℃ / 0.1 mM PGZ | 22.694±0.296 | <0.0001 | 9.284 | 111 |
|  | EXP. 1 | 20 ℃ / 0.5 mM PGZ | 24.457±0.333 | <0.0001 | 17.77 | 138 |
|  | EXP. 1 | 20 ℃ / 2 mM PGZ | 20.986±0.491 | 0.122 | 1.059 | 74 |
|  | EXP. 2 | 20 ℃ / Control | 21.787±0.319 |  |  | 94 |
|  | EXP. 2 | 20 ℃ / 0.1 mM PGZ | 23.850±0.375 | <0.0001 | 9.469 | 80 |
|  | EXP. 2 | 20 ℃ / 0.5 mM PGZ | 24.167±0.405 | <0.0001 | 10.923 | 90 |
|  | EXP. 3 | 20 ℃ / Control | 20.184±0.413 |  |  |  |
|  | EXP. 3 | 20 ℃ / 0.1 mM PGZ | 21.000±0.310 | 0.600 | 3.678 | 90 |
|  | EXP. 3 | 20 ℃ / 0.5 mM PGZ | 23.013±0.373 | <0.0001 | 12.754 | 80 |
|  | EXP. 4 | 20 ℃ / Control | 20.906±0.309 |  |  | 117 |
|  | EXP. 4 | 20 ℃ / 0.1 mM PGZ | 22.695±0.286 | <0.0001 | 8.166 | 105 |
|  | EXP. 4 | 20 ℃ / 0.5 mM PGZ | 24.553±0.309 | <0.0001 | 16.648 | 114 |
|  | EXP. 4 | 20 ℃ / 2 mM PGZ | 22.738±0.335 | <0.0001 | 8.363 | 107 |
|  | | | | | | |
| **PS3551 *hsf-1(sy441) I*** | | | | | | |
| **Figure 3A** | EXP. 1 | 20 ℃ / Control | 20.351±0.347 |  |  | 131 |
| EXP. 1 | 20 ℃ / 0.5 mM PGZ | 19.376±0.426 | 0.101 | # | 93 |
|  | EXP. 2 | 20 ℃ / Control | 21.571±0.376 |  |  | 140 |
|  | EXP. 2 | 20 ℃ / 0.5 mM PGZ | 21.791±0.37 | 0.681 | # | 158 |
|  | EXP. 3 | 20 ℃ / Control | 20.992±0.360 |  |  | 127 |
|  | EXP. 3 | 20 ℃ / 0.5 mM PGZ | 21.503±0.303 | 0.705 | # | 153 |
|  |  |  |  |  |  |  |
| ***MQ887 isp-1(qm150) IV*** | | | | | | |
| **Figure 5A** | EXP. 1 | 20 ℃ / Control | 30.216±0.515 |  |  | 88 |
| EXP. 1 | 20 ℃ / 0.5 mM PGZ | 33.604±0.512 | < 0.0001 | 11.213 | 96 |
|  | EXP. 2 | 20 ℃ / Control | 28.023±0.445 |  |  | 128 |
|  | EXP. 2 | 20 ℃ / 0.5 mM PGZ | 31.757±0.458 | < 0.0001 | 13.325 | 107 |
|  | EXP. 3 | 20 ℃ / Control | 28.414±0.523 |  |  | 111 |
|  | EXP. 3 | 20 ℃ / 0.5 mM PGZ | 32.774±0.425 | < 0.0001 | 15.345 | 124 |
|  | | | | | | |
| ***CF1903 glp-1(e2144) III*** | | | | | | |
| **Figure 4C** | EXP. 1 | 20 ℃ / Control | 30.878±0.827 |  |  | 90 |
| EXP. 1 | 20 ℃ / 0.5 mM PGZ | 31.608±0.692 | 0.141 | # | 120 |
|  | EXP. 2 | 20 ℃ / Control | 29.222±0.525 |  |  | 153 |
|  | EXP. 2 | 20 ℃ / 0.5 mM PGZ | 27.129±1.984 | 0.195 | # | 70 |
|  | EXP. 3 | 20 ℃ / Control | 30.712±0.627 |  |  | 146 |
|  | EXP. 3 | 20 ℃ / 0.5 mM PGZ | 29.928±0.922 | 0.457 | # | 69 |
|  |  |  |  |  |  |  |
| ***CF1038 daf-16(mu86) I*** | | | | | | |
| **Figure 2D** | EXP. 1 | 20 ℃ / Control | 19.967±0.293 |  |  | 122 |
| EXP. 1 | 20 ℃ / 0.5 mM PGZ | 18.865±0.449 | 0.063 | # | 74 |
|  | EXP. 2 | 20 ℃ / Control | 19.574±0.330 |  |  | 108 |
|  | EXP. 2 | 20 ℃ / 0.5 mM PGZ | 19.211±0.530 | 0.220 | # | 76 |
|  | EXP. 3 | 20 ℃ / Control | 20.309±0.486 |  |  | 81 |
|  | EXP. 3 | 20 ℃ / 0.5 mM PGZ | 20.355±0.510 | 0.657 | # | 76 |
|  |  |  |  |  |  |  |
| ***DA1116 eat-2(ad1116) II*** | | | | | | |
| **Figure 4B** | EXP. 1 | 20 ℃ / Control | 26.078±0.602 |  |  | 77 |
| EXP. 1 | 20 ℃ / 0.5 mM PGZ | 26.950±0.595 | 0.063 | # | 101 |
|  | EXP. 2 | 20 ℃ / Control | 26.622±0.569 |  |  | 90 |
|  | EXP. 2 | 20 ℃ / 0.5 mM PGZ | 25.395±0.443 | 0.051 | # | 147 |
|  | EXP. 3 | 20 ℃ / Control | 28.302±0.569 |  |  | 53 |
|  | EXP. 3 | 20 ℃ / 0.5 mM PGZ | 27.042±0.483 | 0.399 | # | 120 |
|  |  |  |  |  |  |  |
| ***CB4876 clk-1(e2519) III*** | | | | | | |
| **Figure 5B** | EXP. 1 | 20 ℃ / Control | 29.159±0.935 |  |  | 82 |
| EXP. 1 | 20 ℃ / 0.5 mM PGZ | 33.854±0.834 | 0.002 | 13.868 | 65 |
|  | EXP. 2 | 20 ℃ / Control | 29.956±0.608 |  |  | 114 |
|  | EXP. 2 | 20 ℃ / 0.5 mM PGZ | 32.676±0.846 | <0.0001 | 9.07 | 71 |
|  | EXP. 3 | 20 ℃ / Control | 28.589±0.363 |  |  | 190 |
|  | EXP. 3 | 20 ℃ / 0.5 mM PGZ | 30.770±0.425 | <0.0001 | 24.269 | 135 |
|  | | | | | | |
| ***EU1 skn-1(zu67) IV*** | | | | | | |
| **Figure 3B** | EXP. 1 | 20 ℃ / Control | 19.494±0.564 |  |  | 89 |
| EXP. 1 | 20 ℃ / 0.5 mM PGZ | 19.620±0.447 | 0.187 | # | 79 |
|  | EXP. 2 | 20 ℃ / Control | 20.730±0.486 |  |  | 89 |
|  | EXP. 2 | 20 ℃ / 0.5 mM PGZ | 20.444±0.363 | 0.232 | # | 133 |
|  | EXP. 3 | 20 ℃ / Control | 19.783±0.598 |  |  | 83 |
|  | EXP. 3 | 20 ℃ / 0.5 mM PGZ | 18.838±0.487 | 0.029 | -5.016 | 80 |
|  |  |  |  |  |  |  |
| ***CB1370 daf-2(e1370) III*** | | | | | | |
| **Figure 2B** | EXP. 1 | 20 ℃ / Control | 48.651±0.811 |  |  | 63 |
| EXP. 1 | 20 ℃ / 0.5 mM PGZ | 47.553±0.510 | 0.011 | # | 132 |
|  | EXP. 2 | 20 ℃ / Control | 47.708±0.617 |  |  | 106 |
|  | EXP. 2 | 20 ℃ / 0.5 mM PGZ | 47.935±0.415 | 0.717 | # | 186 |
|  | EXP. 3 | 20 ℃ / Control | 49.295±0.844 |  |  | 44 |
|  | EXP. 3 | 20 ℃ / 0.5 mM PGZ | 49.520±0.385 | 0.108 | # | 152 |
|  |  |  |  |  |  |  |
| ***RB754 aak-2(ok524) X*** | | | | | | |
| **Figure 4A** | EXP. 1 | 20 ℃ / Control | 20.758±0.390 |  |  | 91 |
| EXP. 1 | 20 ℃ / 0.5 mM PGZ | 20.772±0.325 | 0.730 | # | 123 |
|  | EXP. 2 | 20 ℃ / Control | 20.511±0.306 |  |  | 88 |
|  | EXP. 2 | 20 ℃ / 0.5 mM PGZ | 19.780±0.304 | 0.012 | -3.564 | 91 |
|  | EXP. 3 | 20 ℃ / Control | 20.781±0.273 |  |  | 73 |
|  | EXP. 3 | 20 ℃ / 0.5 mM PGZ | 19.833±0.328 | 0.021 | -4.562 | 54 |
|  | | | | | | |
| ***GR1310 akt-1(mg144) V*** | | | | | | |
| **Figure 2C** | EXP. 1 | 20 ℃ / Control | 22.425±0.312 |  |  | 80 |
| EXP. 1 | 20 ℃ / 0.5 mM PGZ | 21.857±0.394 | 0.136 | # | 49 |
|  | EXP. 2 | 20 ℃ / Control | 20.871±0.514 |  |  | 62 |
|  | EXP. 2 | 20 ℃ / 0.5 mM PGZ | 20.859±0.471 | 0.671 | # | 171 |
|  | EXP. 3 | 20 ℃ / Control | 22.726±0.411 |  |  | 73 |
|  | EXP. 3 | 20 ℃ / 0.5 mM PGZ | 21.736±0.401 | 0.600 | # | 87 |
|  | | | | | | |
| ***AA86 daf-12(rh61rh411) X*** | | | | | | |
| **Figure 4D** | EXP. 1 | 20 ℃ / Control | 21.635±0.617 |  |  | 74 |
| EXP. 1 | 20 ℃ / 0.5 mM PGZ | 22.526±0.418 | 0.732 | # | 95 |
|  | EXP. 2 | 20 ℃ / Control | 21.961±0.708 |  |  | 51 |
|  | EXP. 2 | 20 ℃ / 0.5 mM PGZ | 23.193±0.432 | 0.107 | # | 83 |
|  | EXP. 3 | 20 ℃ / Control | 21.322±0.361 |  |  | 121 |
|  | EXP. 3 | 20 ℃ / 0.5 mM PGZ | 22.064±0.330 | 0.343 | # | 110 |
|  |  |  |  |  |  |  |
| ***VC870 nhr-49(gk405) I*** | | |  |  |  |  |
| **Figure 2A** | EXP. 1 | 20 ℃ / Control | 20.769±0.398 |  |  | 104 |
| EXP. 1 | 20 ℃ / 0.5 mM PGZ | 19.926±0.429 | 0.042 | -4.05 | 68 |
|  | EXP. 2 | 20 ℃ / Control | 20.664±0.485 |  |  | 116 |
|  | EXP. 2 | 20 ℃ / 0.5 mM PGZ | 19.900±0.566 | 0.206 | # | 60 |
|  | EXP. 3 | 20 ℃ / Control | 19.213±0.441 |  |  | 75 |
|  | EXP. 3 | 20 ℃ / 0.5 mM PGZ | 18.379±0.338 | 0.047 | # | 95 |

**Table S1** Survival analyses were conducted using the Kaplan-Meier method. *P* values were calculated by log-rank test for individual experiments. All statistical were performed using SPSS package. “N” displayed the number of dead worms. “#”: no calculate (because p > 0.05).

**Table S2: The gene-specific primers sequences (qPCR)**

| **Primer sequences used for quantitative PCR (5′→3′):** | | |
| --- | --- | --- |
| **Gene** | **Forward primer sequence** | **Reverse primer sequence** |
| *cdc-42* | CTGCTGGACAGGAAGATTACG | CTCGGACATTCTCGAATGAAG |
| *sod-1* | CGTAGGCGATCTAGGAAATGTG | AACAACCATAGATCGGCCAACG |
| *sod-3* | AGCATCATGCCACCTACGTGA | AGCATCATGCCACCTACGTGA |
| *ctl-1* | GACGTATCCAAAACCCCAAGTG | TTGGCATGAACGACACGCTC |
| *ctl-2* | TTCCGATCGAGGACTCCCAG | CTTCACTCCTTGAGTTGGCTTG |
| *dod-3* | CGTATATGGACCCAGCTAATG | ATGAACACCGGCTCATTC |
| *fard-1* | GGGTTTTTGGGAAAGGTGAT | CCACCGATTGCTTTCAATTT |
| *lips-17* | ATCTGTTGCTGGAGCCAATCG | TATCCAACTTTATCGTCTCC |
| *cdr-6* | TCGGGCTTCTCGGTTTACC | CAGCTTTGACCAGAGGAACCA |
| *skn-1* | TGGAGTGTCGTCCATATTCATCT | TGAGGTGTTGGACGATGGTG |
| *gst-4* | TCCGTCAATTCACTTCTTCCG | AAGAAATCATCACGGGCTGG |
